# Supplementary material for: Al2O3-Coated Ni/CeO2 nanoparticles as coke-resistant catalyst for dry reforming of methane
Source: Royal Society of Chemistry journal article supplement (doi:10.1039/d0cy01615b), 2020-01-01
Supplement: d0cy01615b1.pdf [file d0cy01615b1.pdf]

## ***Electronic Supplementary Information***

### **Al<sub>2</sub>O<sub>3</sub>-Coated Ni/CeO<sub>2</sub> Nanoparticles as Coke-Resistant Catalyst for Dry Reforming of Methane**

Euiseob Yang,<sup>a</sup> Eonu Nam,<sup>a</sup> Jihyeon Lee,<sup>a</sup> Hojeong Lee,<sup>a</sup> Eun Duck Park,<sup>\*b</sup> Hankwon Lim,<sup>\*a</sup>  
and Kwangjin An<sup>\*a</sup>

<sup>†</sup> School of Energy and Chemical Engineering, Ulsan National Institute of Science and  
Technology (UNIST), Ulsan 44919, Republic of Korea

<sup>‡</sup> Department of Chemical Engineering and Department of Energy Systems Research, Ajou  
University, Suwon 16499, Republic of Korea

\* To whom correspondence should be addressed (E-mail: [hklim@unist.ac.kr](mailto:hklim@unist.ac.kr) and  
[kjan@unist.ac.kr](mailto:kjan@unist.ac.kr))

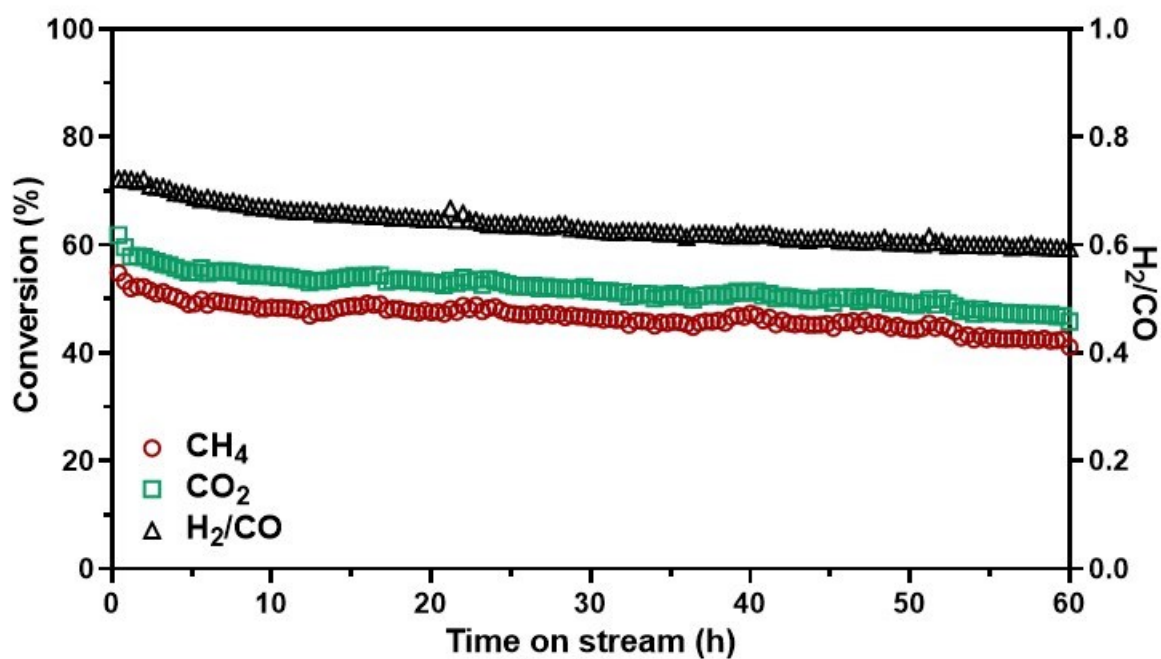

**Fig. S1** Continuous DRM reaction of a Ni/CeO<sub>2</sub>/Al<sub>2</sub>O<sub>3</sub>-(I) catalyst showing CH<sub>4</sub> and CO<sub>2</sub> conversions and the H<sub>2</sub>/CO ratio. Reaction conditions: CH<sub>4</sub>/CO<sub>2</sub>/N<sub>2</sub> volume ratio of 1:1:1, 700 °C, 60 h, atmospheric pressure,  $W_{cat} = 20$  mg, GHSV = 90,000 mL g<sub>cat</sub><sup>-1</sup> h<sup>-1</sup>, and 45 sccm.

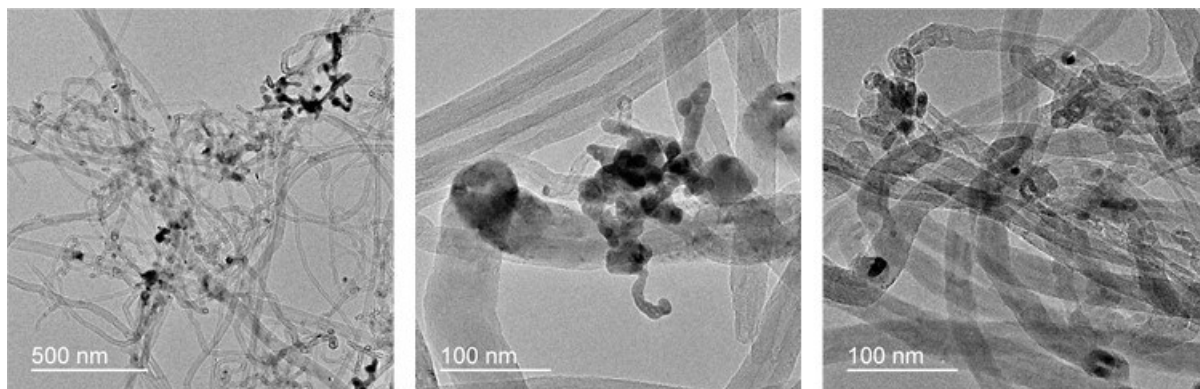

**Fig. S2** TEM images of the spent Ni/CeO<sub>2</sub> catalyst, showing agglomeration of NPs and carbon growth on Ni.

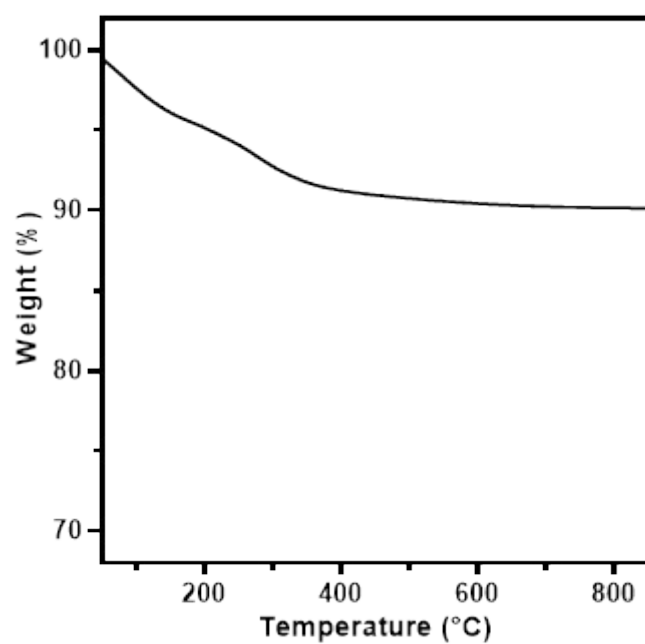

**Fig. S3** TGA measurement of a CeO<sub>2</sub> NR.

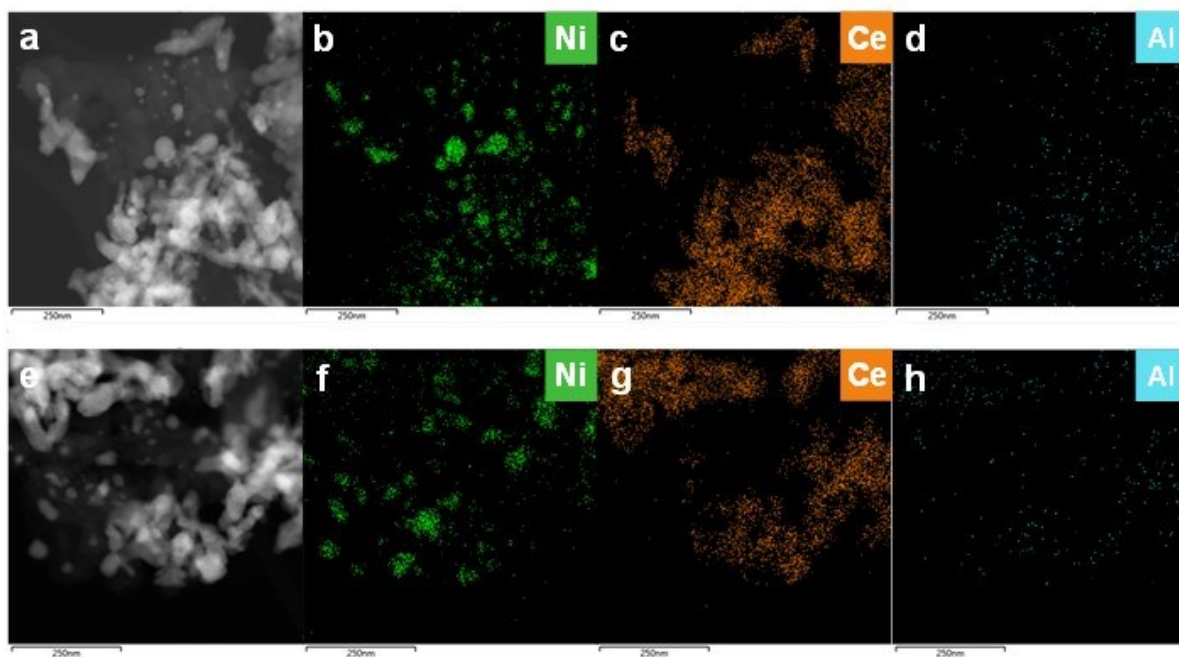

**Fig. S4** HAADF-STEM images (a and e) and the corresponding EDS profile (b–d and f–h) of the spent Ni/CeO<sub>2</sub>/Al<sub>2</sub>O<sub>3</sub>-(I) catalyst.

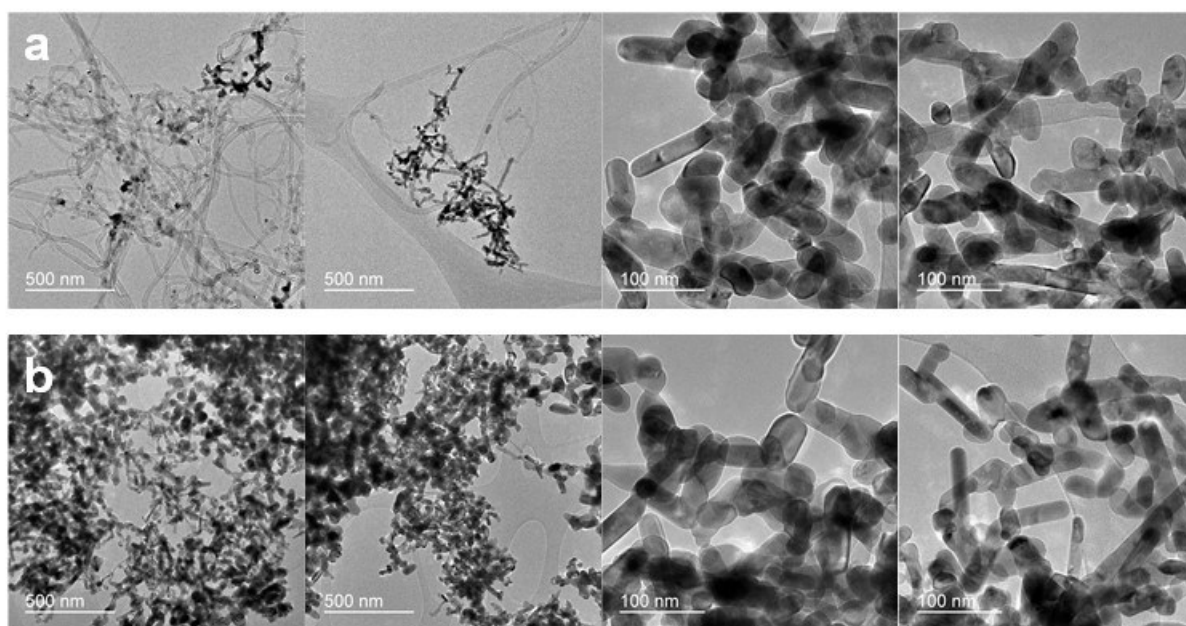

**Fig. S5** TEM images of the spent (a) Ni/CeO<sub>2</sub> and (b) Ni/CeO<sub>2</sub>/Al<sub>2</sub>O<sub>3</sub>-(I) catalysts.

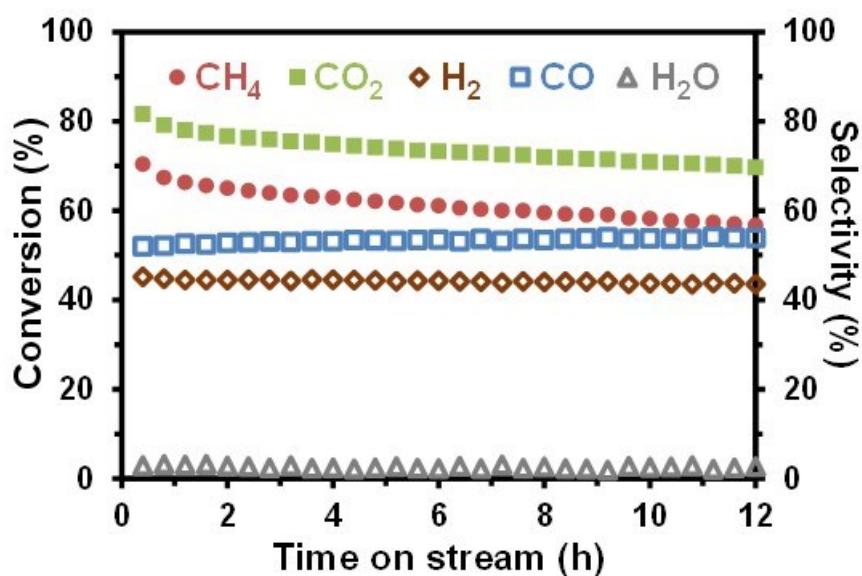

**Fig. S6** Conversion and selectivity obtained from a Ni/Al<sub>2</sub>O<sub>3</sub> catalyst in DRM reaction at 700 °C as a function of time on stream. Reaction conditions: 50 sccm of CH<sub>4</sub>/CO<sub>2</sub>/N<sub>2</sub> volume ratio of 1:1:3 (v/v/v), atmospheric pressure, W<sub>cat</sub> = 50 mg.

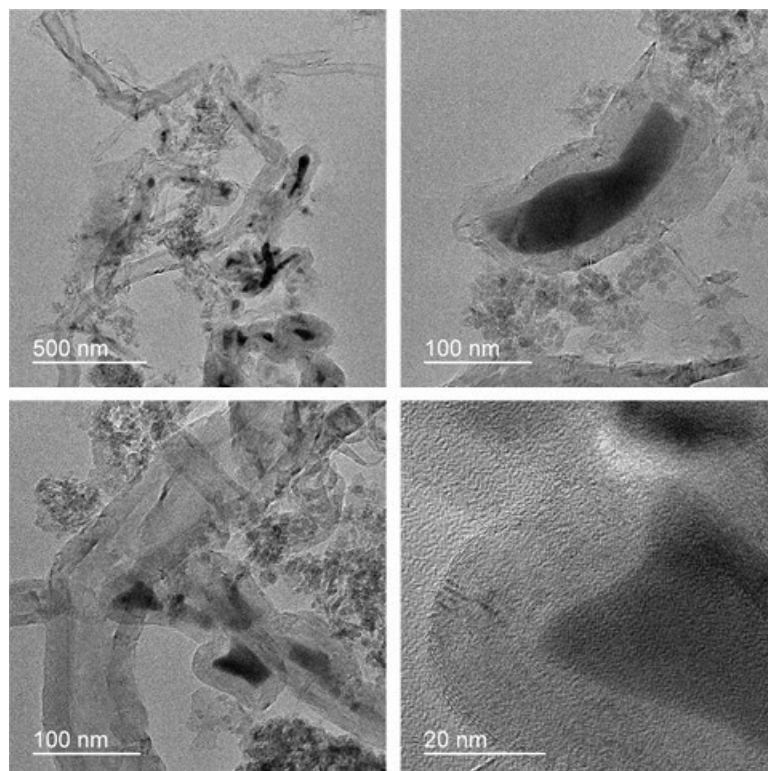

**Fig. S7** TEM images of the spent Ni/Al<sub>2</sub>O<sub>3</sub> catalyst.

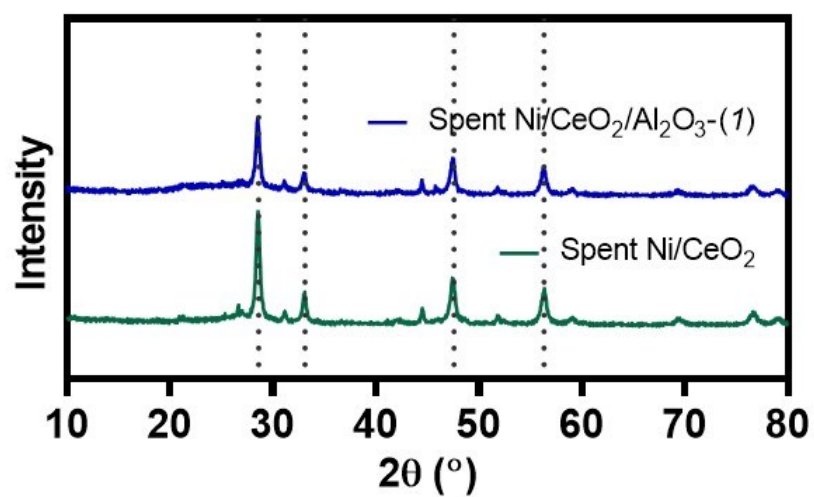

**Fig. S8** XRD patterns of the spent Ni/CeO<sub>2</sub> and Ni/CeO<sub>2</sub>/Al<sub>2</sub>O<sub>3</sub>-(1) catalysts.

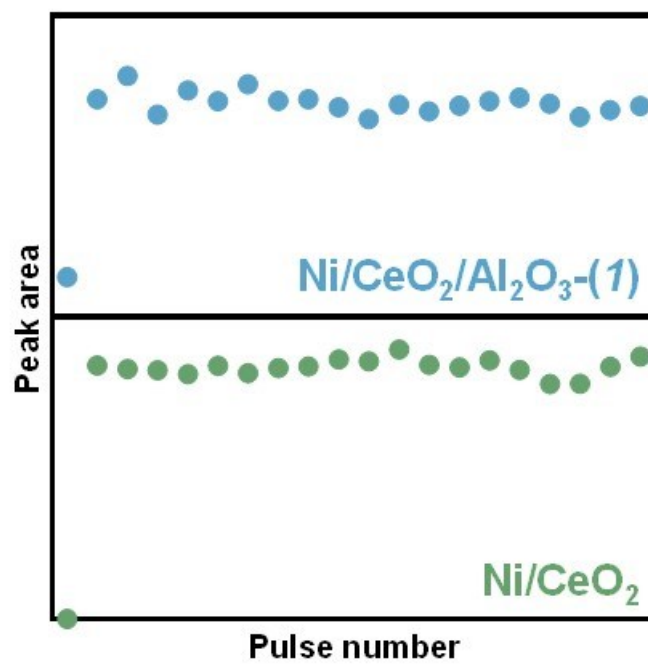

**Fig. S9** CO chemisorption measurement of Ni/CeO<sub>2</sub>/Al<sub>2</sub>O<sub>3</sub>-(1) and Ni/CeO<sub>2</sub> catalysts.
